# Supplementary material
Source: ML conference proceedings conference paper supplement (https://openaccess.thecvf.com/content/CVPR2023/html/Lin_Harmonious_Feature_Learning_CVPR_2023_paper.html)
Supplement: Supplementary file 2 [file Lin_Harmonious_Feature_Learning_CVPR_2023_supplemental.zip]

Archive with 3 entries (2 files):
- supplement1/
- supplement1/supplement.pdf
- supplement1/supplement_video.mp4
